# Supplementary material for: Major Odorants Released as Urinary Volatiles by Urinary Incontinent Patients
Source: Sensors (Basel). 2013 Jul 3;13(7):8523–33. doi: 10.3390/s130708523 (PMC3758608; doi:10.3390/s130708523)
Supplement: Supplementary File 1 — Supplementary Information (PDF, 174 KB) [file sensors-13-08523-s001.pdf]

*Supplementary Information***Major Odorants Released as Urinary Volatiles by Urinary Incontinent Patients. *Sensors* 2013, 13, 8523-8533****Sudhir Kumar Pandey <sup>1,†</sup>, Ki-Hyun Kim <sup>1,\*</sup>, Si On Choi <sup>2</sup>, In Young Sa <sup>2</sup> and Soo Yeon Oh <sup>2</sup>**

<sup>1</sup> Atmospheric Environment Laboratory, Department of Environment & Energy, Sejong University, Seoul 143-747, Korea; E-Mail: skpbhu@gmail.com

<sup>2</sup> Kimberly-Clark Corporation 81, Digital Valley-ro, SuJi-gu, YongIn-si, GyeongGi-do 448-160, Korea; E-Mails: sion.choi@kcc.com (S.C.); inyoung.sa@kcc.com (Y.S.); sooyeon.oh@kcc.com (S.Y.)

<sup>†</sup> Current address: Department of Botany, Guru Ghasidas Central University, Bilaspur C.G. 495009, India.

\* Author to whom correspondence should be addressed; E-Mail: khkim@sejong.ac.kr; Tel.: +82-2-499-9151; Fax: +82-2-3408-4320.

---

**Table S1.** Summary of concentrations of offensive odorants released by different treatments of urine samples from the incontinence patients and normal person.

| Group     | Full Name          | Abbreviations      |                    | Concentration (ppb) <sup>a b</sup> |                    |                     |                  |                    |
|-----------|--------------------|--------------------|--------------------|------------------------------------|--------------------|---------------------|------------------|--------------------|
|           |                    |                    |                    | Treatment Type A                   | Treatment Type B   | Treatment Type C    | Treatment Type D | Treatment Type E   |
| RSC       | Hydrogen sulfide   | H <sub>2</sub> S   | Mean ± SD (Median) | 1.47 ± 1.17 (1.46)                 | 1.03 ± 1.38 (0.31) | 0.22 ± 0.08 (0.17)  | 1.29             | 0.50 ± 0.69 (0.10) |
|           |                    |                    | min-max            | 0.31-2.65                          | 0.17-2.62          | 0.17-0.31           |                  | 0.10-1.29          |
|           | Methyl mercaptan   | CH <sub>3</sub> SH | Mean ± SD (Median) | 1.11 ± 0.60 (1.28)                 | 2.18 ± 3.25 (0.44) | 0.35 ± 0.16 (0.44)  | 1.28             | 0.50 ± 0.67 (0.11) |
|           |                    |                    | min-max            | 0.44-1.61                          | 0.16-5.92          | 0.17-0.44           |                  | 0.10-1.28          |
|           | Dimethyl sulfide   | DMS                | Mean ± SD (Median) | 0.15 ± 0.04 (0.16)                 | 0.37 ± 0.46 (0.03) | 0.13 ± 0.04 (0.11)  | 1.37             | 0.58 ± 0.70 (0.33) |
|           |                    |                    | min-max            | 0.11-0.19                          | 0.10-0.90          | 0.10-0.17           |                  | 0.04-1.37          |
|           | Carbon disulfide   | CS <sub>2</sub>    | Mean ± SD (Median) | 0.13 ± 0.17 (0.03)                 | 0.07 ± 0.06 (0.03) | 0.30 ± 0.47 (0.03)  | 0.60             | 0.26 ± 0.29 (0.11) |
|           |                    |                    | min-max            | 0.03-0.32                          | 0.03-0.13          | 0.03-0.85           |                  | 0.08-0.60          |
|           | Dimethyl disulfide | DMDS               | Mean ± SD (Median) | 0.69 ± 0.67(0.63)                  | 0.72 ± 1.19 (0.05) | 1.23 ± 1.40 (0.03)  | 0.79             | 0.53±0.37 (0.68)   |
|           |                    |                    | min-max            | 0.05-1.38                          | 0.02-2.09          | 0.03-0.85           |                  | 0.10-0.79          |
| Carbonyls | Formaldehyde       | Form-A             | Mean ± SD (Median) | 1.70 ± 1.54 (1.01)                 | 7.95 ± 5.77 (6.26) | 1.84 ± 0.84 (1.46)  | 2.57             | 5.40 ± 5.25 (1.46) |
|           |                    |                    | min-max            | 0.63-3.47                          | 3.22-14.4          | 1.27-2.81           |                  | 2.10-11.5          |
|           | Acetaldehyde       | Acet-A             | Mean ± SD (Median) | 47.2 ± 64.8 (10.6)                 | 79.6 ± 81.5 (66.2) | 60.2±42.6 (24.1)    | 14.5             | 118±107 (89.1)     |
|           |                    |                    | min-max            | 9.08-122                           | 5.56-167           | 11.4-145            |                  | 28-236             |
|           | Acrolein           | Acrolein           | Mean ± SD (Median) | 0.31 ± 0.14 (0.39)                 | 0.31 ± 0.14 (0.39) | 0.31±0.14 (0.39)    | 0.51             | 0.27±0.21 (0.15)   |
|           |                    |                    | min-max            | 0.15-0.39                          | 0.15-0.39          | 0.15-0.39           |                  | 0.15-0.51          |
|           | Acetone            | Acetone            | Mean ± SD (Median) | 399 ± 267 (322)                    | 92.7 ± 79.3 (128)  | 393±267 (313)       | 98.4             | 162 ± 112 (100)    |
|           |                    |                    | min-max            | 179-697                            | 1.93-148           | 175-691             |                  | 175-691            |
|           | Propionaldehyde    | Propion-A          | Mean ± SD (Median) | 0.14 ± 0.01 (0.15)                 | 0.14 ± 0.01 (0.15) | 0.14 ± 0.01 (0.15)  | 0.63             | 0.63 ± 0.53 (0.58) |
|           |                    |                    | min-max            | 0.13-0.15                          | 0.13-0.15          | 0.13-0.15           |                  | 0.13-0.63          |
|           | Crotonaldehyde     | Croton-A           | Mean ± SD (Median) | 0.21 ± 0.15 (0.12)                 | 2.49 ± 3.86 (0.41) | 0.13 ± 0.004 (0.12) | 0.58             | 0.64 ± 0.53 (0.58) |
|           |                    |                    | min-max            | 0.12-0.38                          | 0.12-6.95          | 0.12-0.13           |                  | 0.14-1.20          |
|           | Butyraldehyde      | Butyr-A            | Mean ± SD (Median) | 14.9 ± 25.6 (0.14)                 | 13.1 ± 18.8 (3.06) | 1.02 ± 1.53 (0.14)  | 0.75             | 3.19 ± 3.05 (2.22) |
|           |                    |                    | min-max            | 0.13-44.4                          | 1.40-34.8          | 0.13-2.78           |                  | 0.75-6.61          |

**Table S1. Cont.**

| Group       | Full Name        | Abbreviations   |                        | Concentration (ppb) <sup>a b</sup> |                           |                         |                  |                        |
|-------------|------------------|-----------------|------------------------|------------------------------------|---------------------------|-------------------------|------------------|------------------------|
|             |                  |                 |                        | Treatment Type A                   | Treatment Type B          | Treatment Type C        | Treatment Type D | Treatment Type E       |
|             | Benzaldehyde     | Benz-A          | Mean $\pm$ SD (Median) | 0.12 $\pm$ 0.004 (0.16)            | 0.12 $\pm$ 0.004 (0.13)   | 0.12 $\pm$ 0.004 (0.13) | 0.83             | 0.36 $\pm$ 0.40 (0.13) |
|             |                  |                 | min-max                | 0.12-0.13                          | 1.40-34.8                 | 0.12-0.13               |                  | 0.13-0.83              |
|             | Isovaleraldehyde | Isovaler-A      | Mean $\pm$ SD (Median) | 0.17 $\pm$ 0.03 (0.16)             | 0.17 $\pm$ 0.03 (0.16)    | 0.17 $\pm$ 0.03 (0.13)  | 0.97             | 1.82 $\pm$ 1.73 (0.97) |
|             |                  |                 | min-max                | 0.15-0.21                          | 0.15-0.21                 | 0.12-0.13               |                  | 0.68-3.82              |
|             | Valeraldehyde    | Valer-A         | Mean $\pm$ SD (Median) | 0.17 $\pm$ 0.02 (0.18)             | 0.17 $\pm$ 0.02 (0.18)    | 0.17 $\pm$ 0.02 (0.18)  | 0.69             | 0.35 $\pm$ 0.29 (0.18) |
|             |                  |                 | min-max                | 0.15-0.20                          | 0.15-0.20                 | 0.15-0.20               |                  | 0.18-0.69              |
|             | Propionic acid   | PA              | Mean $\pm$ SD (Median) | 0.15 $\pm$ 0.24 (0.01)             | 3.04 $\pm$ 4.25 (0.75)    | 0.29 $\pm$ 0.49 (0.01)  | 0.64             | 0.33 $\pm$ 0.29 (0.44) |
|             |                  |                 | min-max                | 0.005-0.43                         | 0.42-7.94                 | 0.005-0.86              |                  | 0.01-0.55              |
| Acid        | Butyric acid     | BA              | Mean $\pm$ SD (Median) | 0.01 $\pm$ 0.005 (0.01)            | 0.011 $\pm$ 0.007 (0.009) | 0.01 $\pm$ 0.002 (0.01) | 0.01             | 0.17 $\pm$ 0.28 (0.01) |
|             |                  |                 | min-max                | 0.005-0.01                         | 0.005-0.018               | 0.005-0.01              |                  | 0.01-0.48              |
|             | Isovaleric acid  | IA              | Mean $\pm$ SD (Median) | 0.01 $\pm$ 0.005 (0.01)            | 0.07 $\pm$ 0.12(0.01)     | 0.01 $\pm$ 0.002 (0.01) | 0.01             | 0.21 $\pm$ 0.34 (0.01) |
|             |                  |                 | min-max                | 0.005-0.01                         | 0.005-0.21                | 0.005-0.01              |                  | 0.01-0.60              |
|             | Valeric acid     | VA              | Mean $\pm$ SD (Median) | 0.07 $\pm$ 0.10 (0.01)             | 0.12 $\pm$ 0.19 (0.01)    | 0.07 $\pm$ 0.06 (0.10)  | 0.03             | 0.01 $\pm$ 0.01 (0.01) |
|             |                  |                 | min-max                | 0.01-0.19                          | 0.01-0.35                 | 0.01-0.08               |                  | 0.01-0.03              |
| N compounds | Ammonia          | NH <sub>3</sub> | Mean $\pm$ SD (Median) | 359 $\pm$ 264 (465)                | 207 $\pm$ 256 (58.7)      | 228 $\pm$ 220 (149)     | 639              | 1114 $\pm$ 614 (1391)  |
|             |                  |                 | min-max                | 59-553                             | 58.5-502                  | 58.5-477                |                  | 410-1540               |
|             | Trimethylamine   | TMA             | Mean $\pm$ SD (Median) | 0.18 $\pm$ 0.05 (0.17)             | 0.18 $\pm$ 0.05 (0.17)    | 0.18 $\pm$ 0.05 (0.17)  | 0.31             | 0.21 $\pm$ 0.08 (0.17) |
|             |                  |                 | min-max                | 0.12-23                            | 0.12-0.23                 | 0.12-0.23               |                  | 0.17-0.31              |

**Table S2.** Summary of concentrations of all the VOCs (on GC-MS system) released by different treatments of urine samples from the incontinence patients and normal person.

| VOCs                      |                        | Concentration (ppb) <sup>a, b</sup> |                         |                          |                  |
|---------------------------|------------------------|-------------------------------------|-------------------------|--------------------------|------------------|
| [A] Target VOC            |                        | Treatment type A                    | Treatment type B        | Treatment type C         | Treatment type D |
| Benzene                   | Mean $\pm$ SD (Median) | 0.01 $\pm$ 0.01 (0.02)              | 084 $\pm$ 1.42 (0.02)   | 0.01 $\pm$ 0.01 (0.02)   | 0.01             |
|                           | min-max                | 0.002-0.02                          | 0.02-2.47               | 0.002-0.02               |                  |
| Toluene                   | Mean $\pm$ SD (Median) | 55.0 $\pm$ 88.1 (6.43)              | 8.50 $\pm$ 4.95 (9.89)  | 33.7 $\pm$ 44.8 (13.2)   | 0.81             |
|                           | min-max                | 1.95-157                            | 2.99-12.6               | 2.80-85.1                |                  |
| p-Xylene                  | Mean $\pm$ SD (Median) | 3.31 $\pm$ 3.56 (1.64)              | 7.21 $\pm$ 8.51 (3.23)  | 3.99 $\pm$ 1.97 (3.76)   | 0.54             |
|                           | min-max                | 0.89-7.40                           | 1.42-17                 | 2.16-6.07                |                  |
| Styrene                   | Mean $\pm$ SD (Median) | 3.41 $\pm$ 5.89 (0.01)              | 3.13 $\pm$ 4.43 (1.18)  | 0.01 $\pm$ 0.01 (0.01)   | 0.01             |
|                           | min-max                | 0.01-10.2                           | 0.01-8.21               | 0.001-0.01               |                  |
| Methyl ethyl ketone       | Mean $\pm$ SD (Median) | 50.4 $\pm$ 80.1 (6.56)              | 6.31 $\pm$ 4.25 (4.72)  | 255 $\pm$ 428 (10.6)     | 1.69             |
|                           | min-max                | 1.82-143                            | 3.07-11.1               | 6.45-749                 |                  |
| Isobutyl alcohol          | Mean $\pm$ SD (Median) | 0.03 $\pm$ 0.02 (0.03)              | 2.64 $\pm$ 2.31 (3.43)  | 2.24 $\pm$ 2.68 (1.46)   | 0.01             |
|                           | min-max                | 0.002-0.04                          | 0.03-4.45               | 0.03-5.23                |                  |
| Methyl isobutyl ketone    | Mean $\pm$ SD (Median) | 0.20 $\pm$ 0.31 (0.02)              | 0.01 $\pm$ 0.002 (0.02) | 0.01 $\pm$ 0.002 (0.02)  | 0.01             |
|                           | min-max                | 0.02-0.56                           | 0.01-0.02               | 0.01-0.02                |                  |
| Butyl acetate             | Mean $\pm$ SD (Median) | 0.45 $\pm$ 0.75 (0.01)              | 0.01 $\pm$ 0.001 (0.01) | 0.01 $\pm$ 0.001 (0.01)  | 0.01             |
|                           | min-max                | 0.01-1.31                           | 0.01-0.01               | 0.01-0.01                |                  |
| [B] Other VOCs through MS |                        |                                     |                         |                          |                  |
| Isopropyl alcohol         | Mean $\pm$ SD (Median) | 10.6 $\pm$ 3.92 (10.0)              | 12.5 $\pm$ 21.6 (0.05)  | 19.2 $\pm$ 7.76 (17.1)   | 12.6             |
|                           | min-max                | 7.02-14.8                           | 0.05-37.4               | 12.8-27.8                |                  |
| Pentamethylene            | Mean $\pm$ SD (Median) | 0.03 $\pm$ 0.0003 (0.03)            | 4.89 $\pm$ 6.28 (2.63)  | 0.03 $\pm$ 0.0003 (0.03) | 0.03             |
|                           | min-max                | 0.03-0.03                           | 0.05-12.0               | 0.03-0.03                |                  |
| Methylene Chloride        | Mean $\pm$ SD (Median) | 4.45 $\pm$ 7.69 (0.01)              | 63.7 $\pm$ 110 (0.01)   | 4.64 $\pm$ 8.03 (0.01)   | 0.01             |
|                           | min-max                | 0.01-13.3                           | 0.01-191                | 0.01-13.9                |                  |
| Acetic acid               | Mean $\pm$ SD (Median) | 2.78 $\pm$ 4.81 (0.01)              | 0.01 $\pm$ 0 (0.01)     | 1.75 $\pm$ 3.02 (0.01)   | 0.01             |
|                           | min-max                | 0.01-8.34                           | 0.01-0.02               | 0.01-5.24                |                  |
| Trichloroethylene         | Mean $\pm$ SD (Median) | 0.01 $\pm$ 0 (0.01)                 | 15.8 $\pm$ 27.4 (0.01)  | 0.52 $\pm$ 0.88 (0.01)   | 0.01             |
|                           | min-max                | 0.01-0.01                           | 0.01-47.5               | 0.01-1.54                |                  |

**Table S2.** *Cont.*

| VOCs                         |                        | Concentration (ppb) <sup>a, b</sup> |                         |                         |       |
|------------------------------|------------------------|-------------------------------------|-------------------------|-------------------------|-------|
| Acetonitrile                 | Mean $\pm$ SD (Median) | 116 $\pm$ 48.1 (88.6)               | 99.0 $\pm$ 46.2 (61.1)  | 75.8 $\pm$ 12.9 (74.6)  | 6.60  |
|                              | min-max                | 49.6-209                            | 44.8-191                | 54.0-98.7               |       |
| Ethyl alcohol                | Mean $\pm$ SD (Median) | 29.5 $\pm$ 19.2 (35.8)              | 68.0 $\pm$ 59.3 (47.4)  | 60.6 $\pm$ 52.0 (50.1)  | 12.9  |
|                              | min-max                | 7.88-44.7                           | 21.7-135                | 14.6-117                |       |
| Dichloromethane              | Mean $\pm$ SD (Median) | 16.7 $\pm$ 12.0(15.5)               | 11.1 $\pm$ 19.1 (0.11)  | 13.5 $\pm$ 13.9 (12.6)  | 0.01  |
|                              | min-max                | 5.42-29.3                           | 0.01-33.2               | 0.01-27.8               |       |
| Ethyl acetate                | Mean $\pm$ SD (Median) | 9.19 $\pm$ 15.9 (0.03)              | 32.3 $\pm$ 51.5 (5.06)  | 198 $\pm$ 337 (6.15)    | 13.2  |
|                              | min-max                | 0.03-27.5                           | 0.13-91.8               | 0.53-588                |       |
| Butyl alcohol                | Mean $\pm$ SD (Median) | 0.61 $\pm$ 1.06 (0.002)             | 0.002 $\pm$ 0 (0.002)   | 0.002 $\pm$ 0 (0.002)   | 0.002 |
|                              | min-max                | 0.002-1.84                          | 0.002-0.002             | 0.002-0.002             |       |
| 1-Methoxy-2-propanol         | Mean $\pm$ SD (Median) | 1.39 $\pm$ 2.40 (0.002)             | 0.002 $\pm$ 0 (0.002)   | 1.41 $\pm$ 2.45 (0.002) | 0.002 |
|                              | min-max                | 0.002-4.16                          | 0.002-0.002             | 0.002-4.24              |       |
| Tetrahydrofuran              | Mean $\pm$ SD (Median) | 19.2 $\pm$ 5.75 (16.01)             | 21.1 $\pm$ 7.05 (23.0)  | 30.9 $\pm$ 14.4 (27.4)  | 15.2  |
|                              | min-max                | 15.8-25.8                           | 13.3-27                 | 18.6-46.7               |       |
| Methyl propyl ketone         | Mean $\pm$ SD (Median) | 1.28 $\pm$ 1.54 (0.85)              | 1.27 $\pm$ 2.21 (0.001) | 1.09 $\pm$ 1.30 (0.73)  | 2.79  |
|                              | min-max                | 0.001-3.00                          | 0.001-3.82              | 0.001-2.53              |       |
| Methyl isopropyl ketone      | Mean $\pm$ SD (Median) | 0.02 $\pm$ 0 (0.02)                 | 0.02 $\pm$ 0 (0.02)     | 0.10 $\pm$ 0.14 (0.02)  | 0.02  |
|                              | min-max                | 0.02-0.02                           | 0.02-0.02               | 0.02-0.26               |       |
| 3,3-Dimethyloxetane          | Mean $\pm$ SD (Median) | 0.99 $\pm$ 1.71 (0.001)             | 0.001 $\pm$ 0 (0.001)   | 0.001 $\pm$ 0 (0.001)   | 0.001 |
|                              | min-max                | 0.001-2.97                          | 0.001-0.001             | 0.001-0.001             |       |
| n-Hexane                     | Mean $\pm$ SD (Median) | 0.48 $\pm$ 0.83 (0.001)             | 0.001 $\pm$ 0 (0.001)   | 0.31 $\pm$ 0.53 (0.001) | 0.001 |
|                              | min-max                | 0.001-1.44                          | 0.001-0.001             | 0.001-0.93              |       |
| 1-Methoxy-2-acetoxyp propane | Mean $\pm$ SD (Median) | 5.30 $\pm$ 9.18 (0.001)             | 0.001 $\pm$ 0 (0.001)   | 0.001 $\pm$ 0 (0.001)   | 0.001 |
|                              | min-max                | 0.001-0.14                          | 0.001-0.001             | 0.001-0.001             |       |
| Isothiocyanatocyclohexane    | Mean $\pm$ SD (Median) | 0.05 $\pm$ 0.08 (0.001)             | 0.001 $\pm$ 0 (0.001)   | 0.001 $\pm$ 0 (0.001)   | 0.001 |
|                              | min-max                | 0.001-0.14                          | 0.001-0.001             | 0.001-0.001             |       |
| 2-Methyl-3-hexanone          | Mean $\pm$ SD (Median) | 0.001 $\pm$ 0 (0.001)               | 0.001 $\pm$ 0 (0.001)   | 0.52 $\pm$ 0.90 (0.001) | 0.001 |
|                              | min-max                | 0.001-0.001                         | 0.001-0.001             | 0.001-1.55              |       |
| Ethylbenzene                 | Mean $\pm$ SD (Median) | 0.23 $\pm$ 0.31 (0.09)              | 3.01 $\pm$ 4.60 (0.73)  | 0.74 $\pm$ 0.94 (0.41)  | 0.01  |
|                              | min-max                | 0.01-0.59                           | 0.01-8.31               | 0.01-1.80               |       |

**Table S2.** *Cont.*

| VOCs                            |                        | Concentration (ppb) <sup>a, b</sup> |                           |                         |       |
|---------------------------------|------------------------|-------------------------------------|---------------------------|-------------------------|-------|
| Ethylhexanol                    | Mean $\pm$ SD (Median) | 0.001 $\pm$ 0 (0.001)               | 0.39 $\pm$ 0.67 (0.001)   | 0.001 $\pm$ 0 (0.001)   | 0.001 |
|                                 | min-max                | 0.001-0.001                         | 0.001-1.16                | 0.001-0.001             |       |
| o-Ethyltoluene                  | Mean $\pm$ SD (Median) | 0.17 $\pm$ 0.29 (0.001)             | 0.001 $\pm$ 0 (0.001)     | 0.001 $\pm$ 0 (0.001)   | 0.001 |
|                                 | min-max                | 0.001-0.51                          | 0.001-0.001               | 0.001-0.001             |       |
| 2,2,3-Trimethylhexan            | Mean $\pm$ SD (Median) | 0.001 $\pm$ 0 (0.001)               | 0.91 $\pm$ 1.56 (0.01)    | 0.001 $\pm$ 0 (0.001)   | 0.01  |
|                                 | min-max                | 0.001-0.001                         | 0.01-2.70                 | 0.001-0.001             |       |
| Heptane, 2,2,4,6,6-pentamethyl- | Mean $\pm$ SD (Median) | 0.01 $\pm$ 0 (0.01)                 | 2.20 $\pm$ 3.80 (0.01)    | 0.01 $\pm$ 0 (0.01)     | 0.01  |
|                                 | min-max                | 0.01-0.01                           | 0.01-6.58                 | 0.01-0.01               |       |
| l-Limonene                      | Mean $\pm$ SD (Median) | 0.01 $\pm$ 0 (0.01)                 | 0.008 $\pm$ 0.001 (0.008) | 0.16 $\pm$ 0.27 (0.01)  | 0.01  |
|                                 | min-max                | 0.01-0.01                           | 0.008-0.009               | 0.01-0.47               |       |
| n-Nonyl alcohol                 | Mean $\pm$ SD (Median) | 0.09 $\pm$ 0.15 (0.001)             | 0.0008 $\pm$ 0 (0.0008)   | 0.001 $\pm$ 0 (0.001)   | 0.001 |
|                                 | min-max                | 0.001-0.25                          | 0.0008-0.0008             | 0.001-0.001             |       |
| Limonene                        | Mean $\pm$ SD (Median) | 0.07 $\pm$ 0.12 (0.001)             | 0.0008 $\pm$ 0 (0.0008)   | 0.15 $\pm$ 0.25 (0.001) | 0.001 |
|                                 | min-max                | 0.001-0.21                          | 0.0008-0.0008             | 0.001-0.44              |       |
| Ethylic acid                    | Mean $\pm$ SD (Median) | 0.004 $\pm$ 0 (0.004)               | 0.004 $\pm$ 0 (0.004)     | 1.49 $\pm$ 2.58 (0.004) | 0.004 |
|                                 | min-max                | 0.004-0.004                         | 0.004-0.004               | 0.004-4.47              |       |
| Methyl pyruvate                 | Mean $\pm$ SD (Median) | 0.43 $\pm$ 0.74 (0.001)             | 0.001 $\pm$ 0 (0.001)     | 0.001 $\pm$ 0 (0.001)   | 0.001 |
|                                 | min-max                | 0.001-1.28                          | 0.001-0.001               | 0.001-0.001             |       |
| Methyl methacrylate             | Mean $\pm$ SD (Median) | 0.001 $\pm$ 0 (0.001)               | 0.50 $\pm$ 0.87 (0.001)   | 2.00 $\pm$ 3.46 (0.001) | 0.001 |
|                                 | min-max                | 0.001-0.001                         | 0.001-1.50                | 0.001-5.99              |       |
| 2-Ethylhexanol                  | Mean $\pm$ SD (Median) | 0.18 $\pm$ 0.31 (0.001)             | 0.001 $\pm$ 0 (0.001)     | 0.001 $\pm$ 0 (0.001)   | 0.001 |
|                                 | min-max                | 0.001-0.54                          | 0.001-0.001               | 0.001-0.001             |       |
| Nonane                          | Mean $\pm$ SD (Median) | 0.01 $\pm$ 0 (0.01)                 | 0.20 $\pm$ 0.18 (0.22)    | 0.19 $\pm$ 0.17 (0.22)  | 0.20  |
|                                 | min-max                | 0.01-0.01                           | 0.01-0.36                 | 0.01-0.34               |       |
| Pyrrole                         | Mean $\pm$ SD (Median) | 0.34 $\pm$ 0.53 (0.03)              | 0.03 $\pm$ 0 (0.03)       | 0.30 $\pm$ 0.46 (0.03)  | 0.03  |
|                                 | min-max                | 0.03-0.95                           | 0.03-0.03                 | 0.03-0.83               |       |
| o-X                             | Mean $\pm$ SD (Median) | 0.07 $\pm$ 0.06 (0.03)              | 1.38 $\pm$ 0.98 (1.40)    | 1.47 $\pm$ 1.11 (0.98)  | 1.25  |
|                                 | min-max                | 0.03-0.14                           | 0.39-2.36                 | 0.69-2.73               |       |

**Table S2.** *Cont.*

| VOCs                           |                        | Concentration (ppb) <sup>a, b</sup> |                         |                         |       |
|--------------------------------|------------------------|-------------------------------------|-------------------------|-------------------------|-------|
| 3,7-Dimethylnonane             | Mean $\pm$ SD (Median) | 0.01 $\pm$ 0 (0.01)                 | 4.80 $\pm$ 8.31(0.01)   | 0.01 $\pm$ 0 (0.01)     | 0.01  |
|                                | min-max                | 0.01-0.01                           | 0.01-14.4               | 0.01-0.01               |       |
| 2,2,4,6,6-Pentamethylheptane   | Mean $\pm$ SD (Median) | 0.01 $\pm$ 0 (0.01)                 | 1.37 $\pm$ 2.36 (0.01)  | 0.01 $\pm$ 0 (0.01)     | 0.01  |
|                                | min-max                | 0.01-0.01                           | 0.01-4.10               | 0.01-0.01               |       |
| 5-Ethyl-2,2,3-trimethylheptane | Mean $\pm$ SD (Median) | 0.30 $\pm$ 0.51 (0.004)             | 12.7 $\pm$ 13.4 (11.4)  | 0.001 $\pm$ 0 (0.001)   | 0.001 |
|                                | min-max                | 0.004-0.88                          | 0.004-26.8              | 0.001-0.001             |       |
| 2,3,5,8-Tetramethyldecane      | Mean $\pm$ SD (Median) | 0.002 $\pm$ 0 (0.002)               | 0.60 $\pm$ 1.03 (0.002) | 0.002 $\pm$ 0 (0.002)   | 0.002 |
|                                | min-max                | 0.002-0.002                         | 0.002-1.79              | 0.002-0.002             |       |
| Dipropyl ketone                | Mean $\pm$ SD (Median) | 0.29 $\pm$ 0.44 (0.06)              | 0.49 $\pm$ 0.83 (0.01)  | 0.02 $\pm$ 0.01 (0.01)  | 2.66  |
|                                | min-max                | 0.01-0.80                           | 0.01-1.45               | 0.01-0.03               |       |
| 1,3,5 TMB                      | Mean $\pm$ SD (Median) | 0.01 $\pm$ 0 (0.01)                 | 0.01 $\pm$ 0 (0.01)     | 0.36 $\pm$ 0.62 (0.001) | 0.40  |
|                                | min-max                | 0.01-0.01                           | 0.01-0.01               | 0.001-0.02              |       |

<sup>a</sup> Treatment types A, B, and C represents mean of three patients (For instance, A is mean of A1, A2, and A3 as described in Table 1). Treatment type E is the mean of three normal person's experiment (*i.e.*, E1, E2, and E3 as described in Table 1); <sup>b</sup> For all the cases of below detection limit, 1/2 of the respective detection limit (DL) were considered for calculation of statistics.
